# Supplementary material
Source: PubMed Central journal article supplement (PMC3024689)
Supplement: 1012694108_pnas.201012694SI.pdf [file 1012694108_pnas.201012694SI.pdf]

# Supporting Information

Jogler et al. 10.1073/pnas.1012694108

## SI Materials and Methods.

**Electron Microscopy.** For chemical fixation, cells were incubated in 2.5% glutaraldehyde containing fixative buffer (75 mM sodium cacodylate, 2 mM MgCl<sub>2</sub>, pH 7.0), for 1 h at room temperature. Afterward, samples were rinsed several times in fixative buffer and postfixed at room temperature for 1 h with 1% osmium tetroxide in fixative buffer. After two washing steps in water, the cells were stained *en bloc* for 30 min with 1% uranyl acetate in 20% acetone. Dehydration was performed with a graded acetone series. Samples were then infiltrated and embedded in Spurr's low-viscosity resin.

For high-pressure freezing, aluminum platlets were filled with concentrated cell suspensions and the cells immobilized by high-pressure freezing (Leica; HPM100). Freeze substitution was performed in acetone with 2% osmium tetroxide and 0.2% uranyl acetate, including 5% water. After embedding the samples in Epon, ultrathin sections were cut with a diamond knife and mounted onto uncoated copper grids. The sections were post-stained with aqueous lead citrate (100 mM, pH 13.0).

Transmission electron micrographs were taken with an EM 912 electron microscope (Zeiss) equipped with an integrated OMEGA energy filter operated at 80 kV in the zero loss mode. The FIB serial sectioning was performed by a Zeiss-Auriga workstation. The focused ion beam consisted of Ga<sup>+</sup> ions accelerated by a voltage of 30 kV. In the cut-and-view mode, sections ranging in thickness between 5 nm and 10 nm (dependent on the magnification) were produced with the FIB and FESEM images, which were recorded at 1.5 kV using the in-lens energy selective backscattered (EsB) detector. Specimens were tilted to an angle of 54°; images were tilt corrected for undistorted surface view.

For SEM, drops of the sample were placed onto a glass slide, covered with a coverslip, and rapidly frozen with liquid nitrogen. The coverslip was removed with a razor blade and the glass slide was immediately fixed with 2.5% glutaraldehyde in 75 mM cacodylate buffer (pH 7.0), postfixed with 1% osmium tetroxide in fixative buffer, dehydrated in a graded series of acetone solutions, and critical-point dried after transfer to liquid CO<sub>2</sub>. Specimens were mounted on stubs, coated with 3 nm platinum using a magnetron sputter coater, and examined with a Zeiss Auriga scanning electron microscope operated at 1–2 kV. For cryo-scanning electron microscopy high-pressure frozen samples were fractured with a Leica EM MED020, sublimated for 1–2 min at

–95 °C and coated with 3 nm of tungsten, transferred to the scanning electron microscope and examined at 1 kV.

**Single Cell Sorting and Whole Genome Amplification (WGA).** Single cell sorting was achieved via an Eppendorf TransferMan NK2 micromanipulator and the Eppendorf CellTram Oil manual hydraulic pressure-control system mounted to an Olympus BX61 microscope equipped with a 40× LD objective and a double slide holder. Samples were kept on microscopic slides attached to a custom-build plastic frame, while an Advalytix AmpliGrid AG480F was placed next to it in the double slide holder (Fig. S6C). Five to 15 individual Mbav cells were transferred via micromanipulation from the 5-μL sample droplet (containing variable amounts of MTB) into two different washing droplets (5 μL) and finally into 0.75 μL sample buffer (Illustra GenomiPhi V2 DNA amplification kit; GE Healthcare) covered with 5 μL of sealing solution (Advalytix). Together, this washing procedure resulted in a 10<sup>18</sup>-fold dilution of sample liquid, which is likely to have outdiluted any contaminating DNA to extinction (Fig. S10). Loaded AmpliGrid was transferred into a customized Ampli-Speed slide cycler (Advalytix) calibrated to operate at 4 °C. Samples were heated to 95 °C for 3 min and incubated at 4 °C for 10 min. A total of 0.75 μL of reaction buffer containing enzyme mix (Illustra GenomiPhi V2 DNA amplification kit; GE Healthcare) was added by pipetting on top of the sealing solution (Advalytix) and reactions were incubated for 4 h at 30 °C. The phi29 enzyme was inactivated by incubating the sample at 65 °C for 10 min. After amplification, seven independent reactions—based on a total number of 158 individually sorted Mbav cells—were pooled to overcome phi29 bias and a 16S rRNA gene library was constructed as described previously (1). Sequence analysis of 25 clones revealed identical Mbav sequences (cutoff 99%).

**Screening of Fosmid Libraries.** Six fosmid libraries that were constructed before were screened via endsequencing as previously described (2, 3). Based on sequence analysis of individually sorted cells after WGA, the primers CJ272 (cactacgccaccctgaagt) and CJ273 (tgaggtaatcgcatcaaca) targeting a 130-bp region of *mamE*, as well as the primers CJ280 (ttgatattacatgatctg) and CJ281 (cgaggcaacggagaagatac) targeting a 555-bp region of *mamP* were deduced. The PCR-based fosmid library screening was performed as previously described (3).

1. Lin W, Pan Y (2009) Uncultivated magnetotactic cocci from yuandadu park in beijing, china. *Appl Environ Microbiol* 75:4046–4052.
2. Jogler C, et al. (2009) Toward cloning of the magnetotactic metagenome: Identification of magnetosome island gene clusters in uncultivated magnetotactic bacteria from different aquatic sediments. *Appl Environ Microbiol* 75:3972–3979.
3. Jogler C, et al. (2010) Cultivation-independent characterization of 'Candidatus Magnetobacterium bavaricum' via ultrastructural, geochemical, ecological and metagenomic methods. *Environ Microbiol* 12:2466–2478.

4. Preusting H, Kingma J, Huisman G, Steinbüchel A, Witholt B (1993) Formation of polyester blends by a recombinant strain of *Pseudomonas oleovorans*: Different poly (3-hydroxyalkanoates) are stored in separate granules. *J Environ Polym Degrad* 1: 11–21.



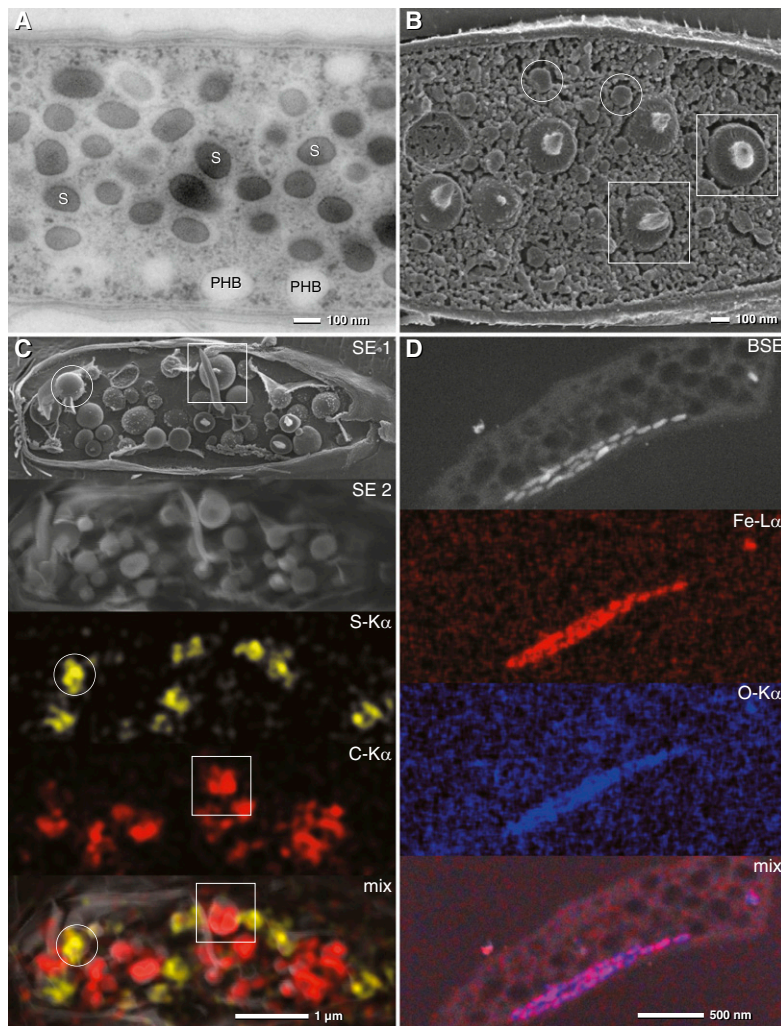

**Fig. S2.** TEM, SEM, and X-ray analysis of the different intracellular inclusions. (A) TEM of a section from high-pressure frozen and freeze-substituted *Candidatus Magnetobacterium bavaricum* (Mbav) cell. Two types of roughly globular inclusions are visible: electron dense sulfur globules (50–150 nm) and electron translucent polyhydroxybutyrate (PHB) granules (300–500 nm). The PHB granules can be recognized by their characteristic freeze-fracturing behavior resulting in the formation of “mushroom”-like protrusions (squares) (4) as seen in cryo-SEM (B). Frozen hydrated cell (C) before element mapping (SE1) and after mapping (SE2) revealing some distortion by beam damage at the rather high voltage of 4 kV necessary for elemental analysis. Sulfur globules (circles) and PHB granules (squares) can be discerned by their different signals ( $S-K_{\alpha}$ ) and higher carbon content of PHB as shown in the Lower panels. (D) SEM of ultrathin sections of Mbav. Detection of backscattered electron gives a bright signal of the magnetosome crystals (D, BSE). X-ray mapping of oxygen and iron generated by the particles is consistent with magnetite ( $Fe_3O_4$ ).



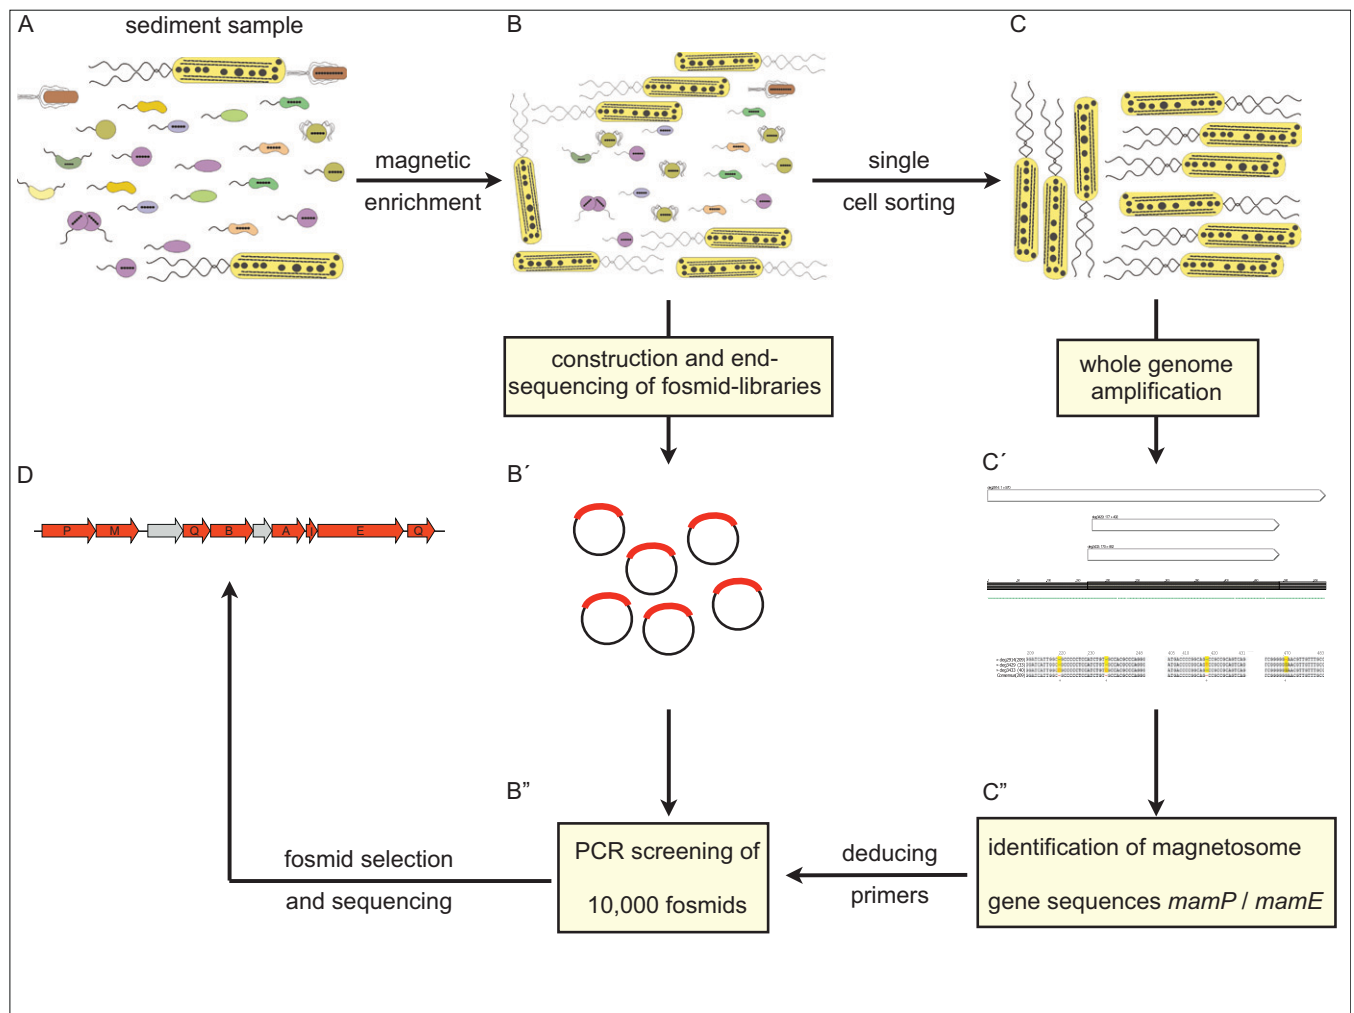

**Fig. 54.** Schematic representation of the strategy that led to the identification of a 37-kb genomic fragment of *Candidatus Magnetobacterium bavaricum* (Mbav) containing a part of a putative magnetosome island (MAI). (A) Starting point were environmental sediment samples. (B) A two-step magnetic separation process resulted in selective collection of MTB highly enriched in Mbav content. (B') This enrichment was used for the construction of metagenomic fosmid libraries and for single cell sorting. (C) Single cell sorting via micromanipulation. (C') The manually sorted Mbav cells were subject to phi29 mediated whole genome amplification and subsequent sequence determination via pyrosequencing. (C'') Two putative magnetosome gene fragments (*mamE* and *mamP*) were identified. These fragments were used to deduce specific PCR primers. (B'') Subsequent screening of fosmid libraries led to the identification of five fosmids. (D) Sequence analysis of these five fosmids resulted in a 37-kb contig containing several magnetosome genes. (B') Conventional endsequencing of the fosmid libraries done in parallel failed to identify any magnetosome gene containing fosmid.

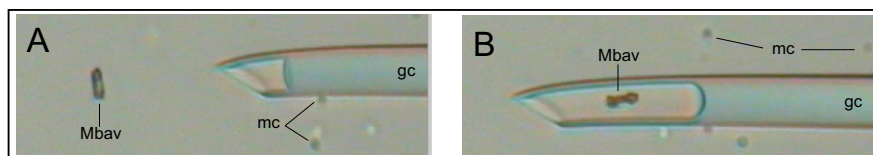

**Fig. 55.** Micromanipulation of individual Mbav cells from a magnetically enriched mixture of different MTB. Micrographs (400 $\times$  magnification) show a glass capillary (gc) before A and after B aspiration of an individual target cell. Contaminating magnetic cocci (mc) can be clearly discriminated.



# MamA

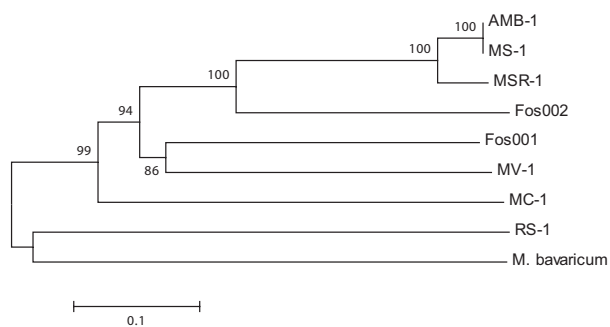

# MamE

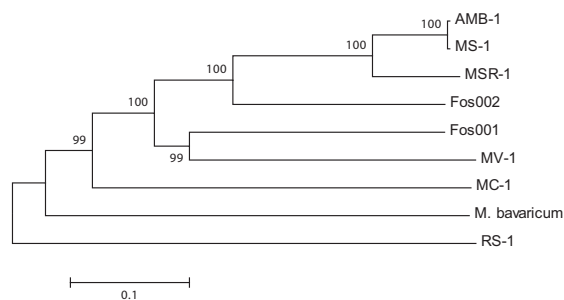

# MamP

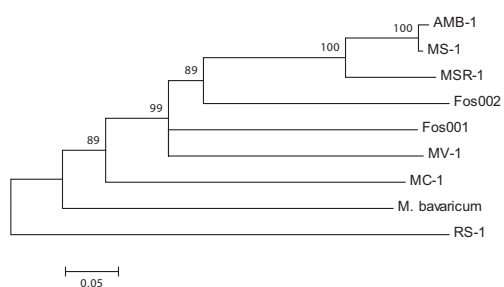

# MamQ

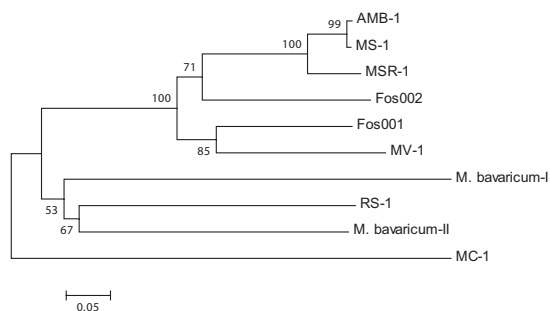

**Fig. S8.** Phylogenetic trees of further putative magnetosome proteins MamA, -E, -P, -Q, which display branching patterns congruent to those obtained for MamB and MamM. AMB-1, *Magnetospirillum magneticum*; MS-1, *Magnetospirillum magnetotacticum*; MSR-1, *Magnetospirillum gryphiswaldense*; Fos, Metagenomic clone; MV-1, magnetotactic vibrio strain MV-1; MC-1, magnetotactic coccus strain MC-1; and RS-1, *Desulfovibrio magneticus*.

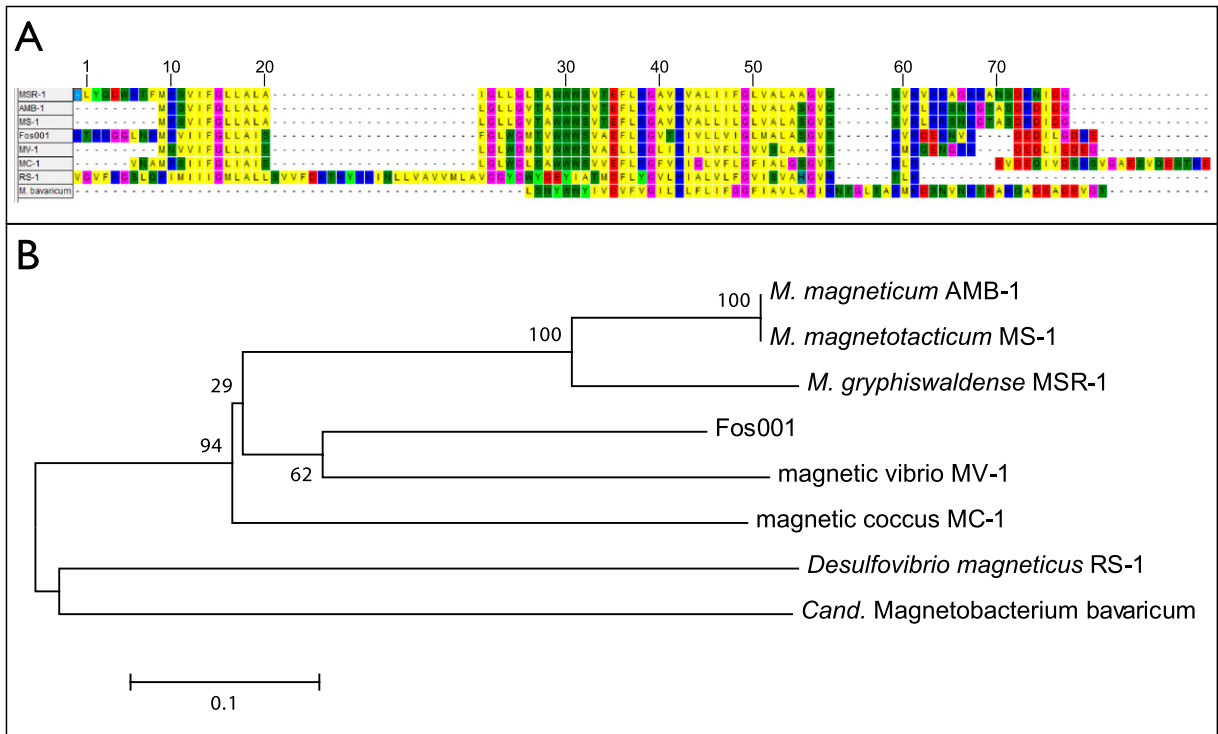

**Fig. 59.** (A) Multiple sequence alignment of Maml homologs from *Candidatus Magnetobacterium bavaricum* (Mbav), selected cultivated MTB, and a metagenomic clone (Fos001). Amino acid positions correspond to the Maml protein of *M. gryphiswaldense* MSR-1. The putative Mbav Maml protein is shorter than all other Maml proteins. (B) Phylogenetic tree calculated from the alignment shown in A. Maml homologs from *Desulfovibriomagneticus* RS-1 and Mbav cluster together, but are separated from other MTB. Bootstrap values and the bootstrap consensus tree are shown.

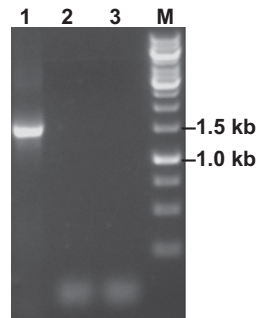

**Fig. 510.** Results of a nontemplate control experiment for whole genome amplification (WGA). The control experiment was performed as the previously described sorting experiment and the preparation of WGA DNA for pyrosequencing (Fig. 55 and *Materials and Methods*), except one modification: About 15 *Candidatus Magnetobacterium bavaricum* (Mbav) cells were transferred from a 5- $\mu$ L sample droplet into a 5- $\mu$ L sorting droplet, which consists of 5  $\mu$ L of filter-sterilized (0.45  $\mu$ m pore size) sample water (identical to the 5- $\mu$ L sample droplet, but without cells). As previously described, sorted cells were subsequently transferred into a 5- $\mu$ L H<sub>2</sub>O droplet for further washing before transfer onto the Ampligridd was performed. After processing 82 cells in total, the capillary was used to harvest nontemplate control samples from sorting- and washing droplet. Together with the sorted cells, these samples were subjected to WGA and subsequent PCR experiments to check for extracellular DNA contaminations. PCR amplification of the 16S rRNA gene from the MTB sample (line 1), the filter-sterilized sample water (line 2), and the H<sub>2</sub>O washing droplet (line 3) was performed as previously described (2), (lane M, Fermentas 1-kb DNA ladder). Only lane 1 shows the expected band corresponding to the full-length 16S rRNA gene, whereas lanes 2 and 3 do not show any band. Therefore, it can be confidently concluded from the nontemplate WGA control that the washing procedure was sufficiently stringent to remove any extracellular DNA contaminations.





**Table S1. Blast analysis of proteins encoded by predicted genes against the NCBI database**

| Locus tag | Annotation                                           | Best hit                                  | Identity, % | e-value     | aa         |
|-----------|------------------------------------------------------|-------------------------------------------|-------------|-------------|------------|
| emg00001  | Hypothetical protein                                 | <i>Gloeobacter violaceus</i>              | 38          | 1–32        | 516        |
| emg00002  | XRE family transcriptional regulator                 | <i>Yersinia pseudotuberculosis</i>        | 33          | 7–17        | 206        |
| emg00003  | Aspartate 1-decarboxylase                            | <i>Thermodesulfovibrio yellowstonii</i>   | 52          | 4–32        | 117        |
| emg00004  | 4-hydroxy-3-methylbut-2-en-1-yl diphosphate synthase | <i>Thermodesulfovibrio yellowstonii</i>   | 60          | 3–120       | 348        |
| emg00005  | Hypothetical protein                                 | <i>Thermodesulfovibrio yellowstonii</i>   | 45          | 3–72        | 319        |
| emg00006  | Hypothetical protein                                 | <i>Thermodesulfovibrio yellowstonii</i>   | 61          | 1–51        | 180        |
| emg00007  | Transcriptional regulator, MerR family               | <i>Sphaerobacter thermophilus</i>         | 33          | 4–16        | 128        |
| emg00008  | IS1 transposase B                                    | <i>Escherichia coli</i>                   | 100         | 1–94        | 167        |
| emg00009  | Hypothetical protein                                 | <i>Syntrophomonas wolfei</i>              | 30          | 4–57        | 791        |
| emg00010  | Transposase                                          | Plasmid R100                              | 100         | 0.0         | 402        |
| emg00011  | Hypothetical protein                                 | <i>Syntrophobacter fumaroxidans</i>       | 41          | 1–67        | 1,038      |
| emg00012  | Hypothetical protein                                 | <i>Chloroflexus aggregans</i>             | 32          | 5–64        | 1,135      |
| emg00013  | <b>Polysaccharide biosynthesis protein</b>           | <b><i>Methanococcus aeolicus</i></b>      | <b>23</b>   | <b>2–20</b> | <b>489</b> |
| emg00014  | Hypothetical protein                                 | <i>Sulfurihydrogenibium azorense</i>      | 51          | 0.032       | 63         |
| emg00015  | Conserved hypothetical protein                       | <i>Aspergillus flavus</i>                 | 47          | 5–04        | 229        |
| emg00016  | Hypothetical protein                                 | <i>Desulfovibrio magneticus</i>           | 39          | 1–15        | 237        |
| emg00017  | Pyruvate phosphate dikinase                          | <i>Anaplasma marginale</i>                | 23          | 0.003       | 196        |
| emg00018  | Hypothetical protein                                 | <i>Desulfovibrio magneticus</i>           | 39          | 1–73        | 543        |
| emg00019  | Putative membrane protein                            | <i>Carboxydotherrmus hydrogenoformans</i> | 43          | 5–46        | 358        |
| emg00020  | Hypothetical protein                                 | <i>Bacteroides coprocola</i>              | 35          | 0.16        | 383        |
| emg00021  | NA                                                   | NA                                        | NA          | N.A.        | 69         |
| emg00022  | Condensin subunit Smc                                | <i>Methanohalophilus mahii</i>            | 27          | 1.9         | 252        |
| emg00023  | NA                                                   | NA                                        | NA          | N.A.        | 46         |
| emg00024  | Similar to GA14224-PA                                | <i>Tribolium castaneum</i>                | 22          | 0.14        | 146        |
| emg00025  | LemA protein ( <i>mamQ-I</i> )                       | <i>Mitsuokella multacida</i>              | 36          | 5–25        | 186        |
| emg00026  | Magnetosome protein MamE                             | Uncultured bacterium                      | 31          | 2–57        | 603        |
| emg00027  | Magnetosome protein MamI                             | Magnetic vibrio MV-1                      | 29          | 0.78        | 62         |
| emg00028  | TPR Domain containing protein ( <i>mamA</i> )        | <i>Tetrahymina thermophila</i>            | 32          | 8–23        | 216        |
| emg00029  | Hypothetical membrane protein                        | <i>Desulfovibrio magneticus</i>           | 28          | 1–07        | 127        |
| emg00030  | Magnetosome protein MamB                             | Uncultured bacterium                      | 32          | 3–41        | 297        |
| emg00031  | LemA protein ( <i>mamQ-II</i> )                      | <i>Campylobacter showae</i>               | 32          | 2–17        | 182        |
| emg00032  | Hypothetical protein                                 | <i>Desulfotobacterium hafniense</i>       | 27          | 7–08        | 227        |
| emg00033  | Magnetosome protein MamM                             | <i>Magnetospirillum gryphiswaldense</i>   | 35          | 2–44        | 307        |
| emg00034  | Magnetosome protein MamP                             | Magnetic vibrio MV-1                      | 37          | 2–23        | 375        |

Results of BlastP analysis of proteins encoded by predicted genes of the 37,160-bp genomic fragment from *Candidatus Magnetobacterium bavaricum* against the NCBI database. Best BlastP hits are shown. Genes of a magnetosome cluster are in boldface type. The genes *emg00025* and *emg00031* encode proteins that were found to contain a LemA motive and were annotated as *mamQ*-like. Gene *emg00028* encodes a protein containing a TPR domain and was annotated as *mamA*-like (see text for details). All other genes were annotated according their best BlastP hits. NCBI, National Center for Biotechnology Information.

**Table S2. BlastP similarities of putative magnetosome proteins from *Candidatus Magnetobacterium bavaricum* with their homologs from all MTB sequenced thus far**

| Protein | MSR-1, % | AMB-1, % | MS-1, % | MV-1, % | MC-1, % | RS-1, % |
|---------|----------|----------|---------|---------|---------|---------|
| MamP    | 38       | 38       | 39      | 37      | 43      | 40      |
| MamM    | 35       | 35       | 36      | 32      | 36      | 27      |
| MamQ-II | 24       | 21       | 21      | 23      | 22      | 26      |
| MamB    | 31       | 30       | 30      | 30      | 32      | 34      |
| MamA    | 24       | 23       | 23      | 26      | NA      | 25      |
| MamI    | 25       | 23       | 23      | 29      | 35      | 35      |
| MamE    | 40       | 26       | 26      | 36      | 30      | 30      |
| MamQ-I  | 28       | 27       | 28      | 26      | NA      | 36      |

Local identity values are shown. See Figs. 4 and 5 and Figs. S7 and S8 for analysis involving ClustalW alignments of entire protein sequences. MTB, magnetotactic bacteria.

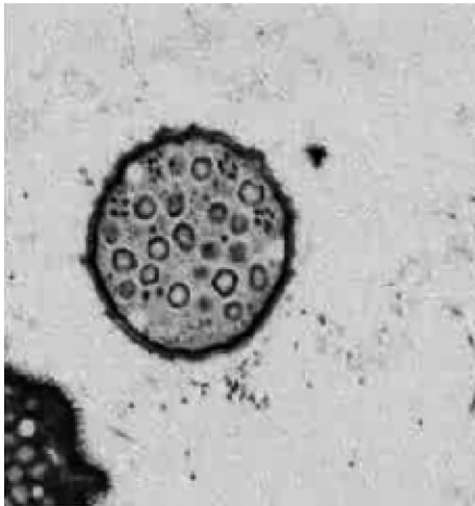

**Movie S1.** Three-dimensional reconstruction by SEM and focused ion beam (FIB) cross-sectioning (anterior toward posterior) of high-pressure frozen and freeze-substituted *Candidatus Magnetobacterium bavaricum* cell.

[Movie S1](#)

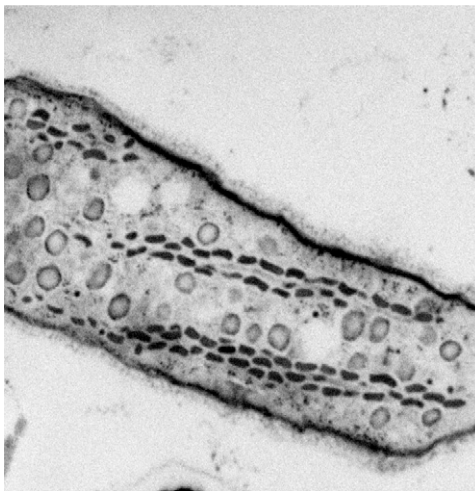

**Movie S2.** Three-dimensional reconstruction by SEM and FIB tangential sectioning of high-pressure frozen and freeze-substituted *Candidatus Magnetobacterium bavaricum* cell.

[Movie S2](#)

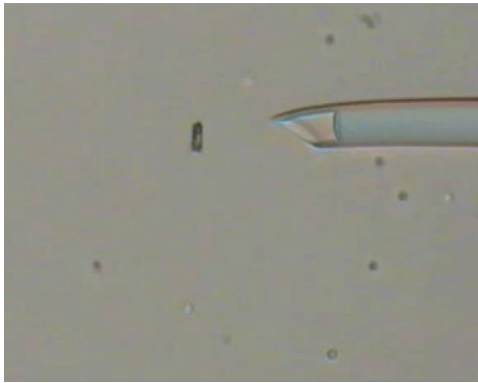

**Movie S3.** Micromanipulation of *Candidatus Magnetobacterium bavaricum* cells: Selection and aspiration of a single target cell from a mixture of MTB into a microcapillary.

[Movie S3](#)

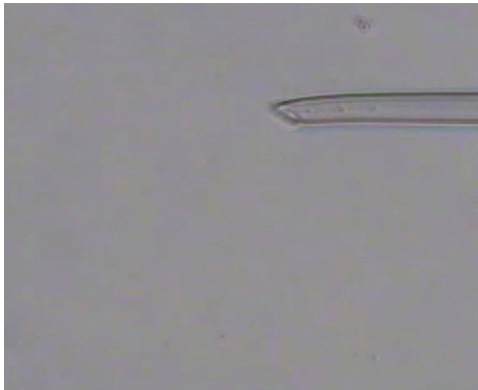

**Movie S4.** Ejection of >1,000 collected *Candidatus Magnetobacterium bavaricum* cells from a microcapillary into a droplet of pure H<sub>2</sub>O. Cells, which had been trapped within the microcapillary for a prolonged time, remained intact and viable in H<sub>2</sub>O as indicated by their active swimming motility after release.

[Movie S4](#)

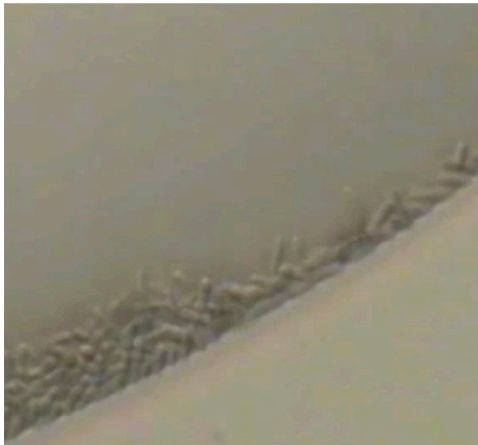

**Movie S5.** "*Candidatus Magnetobacterium bavaricum*" survives the cell sorting procedure. After being washed and transferred into a droplet of water ([Movie S4](#)), cells swim actively toward magnetic north to the edge of the water droplet.

[Movie S5](#)
